# Supplementary material
Source: PubMed Central journal article supplement (PMC4288521)

# Figure S5. CONSORT Diagram

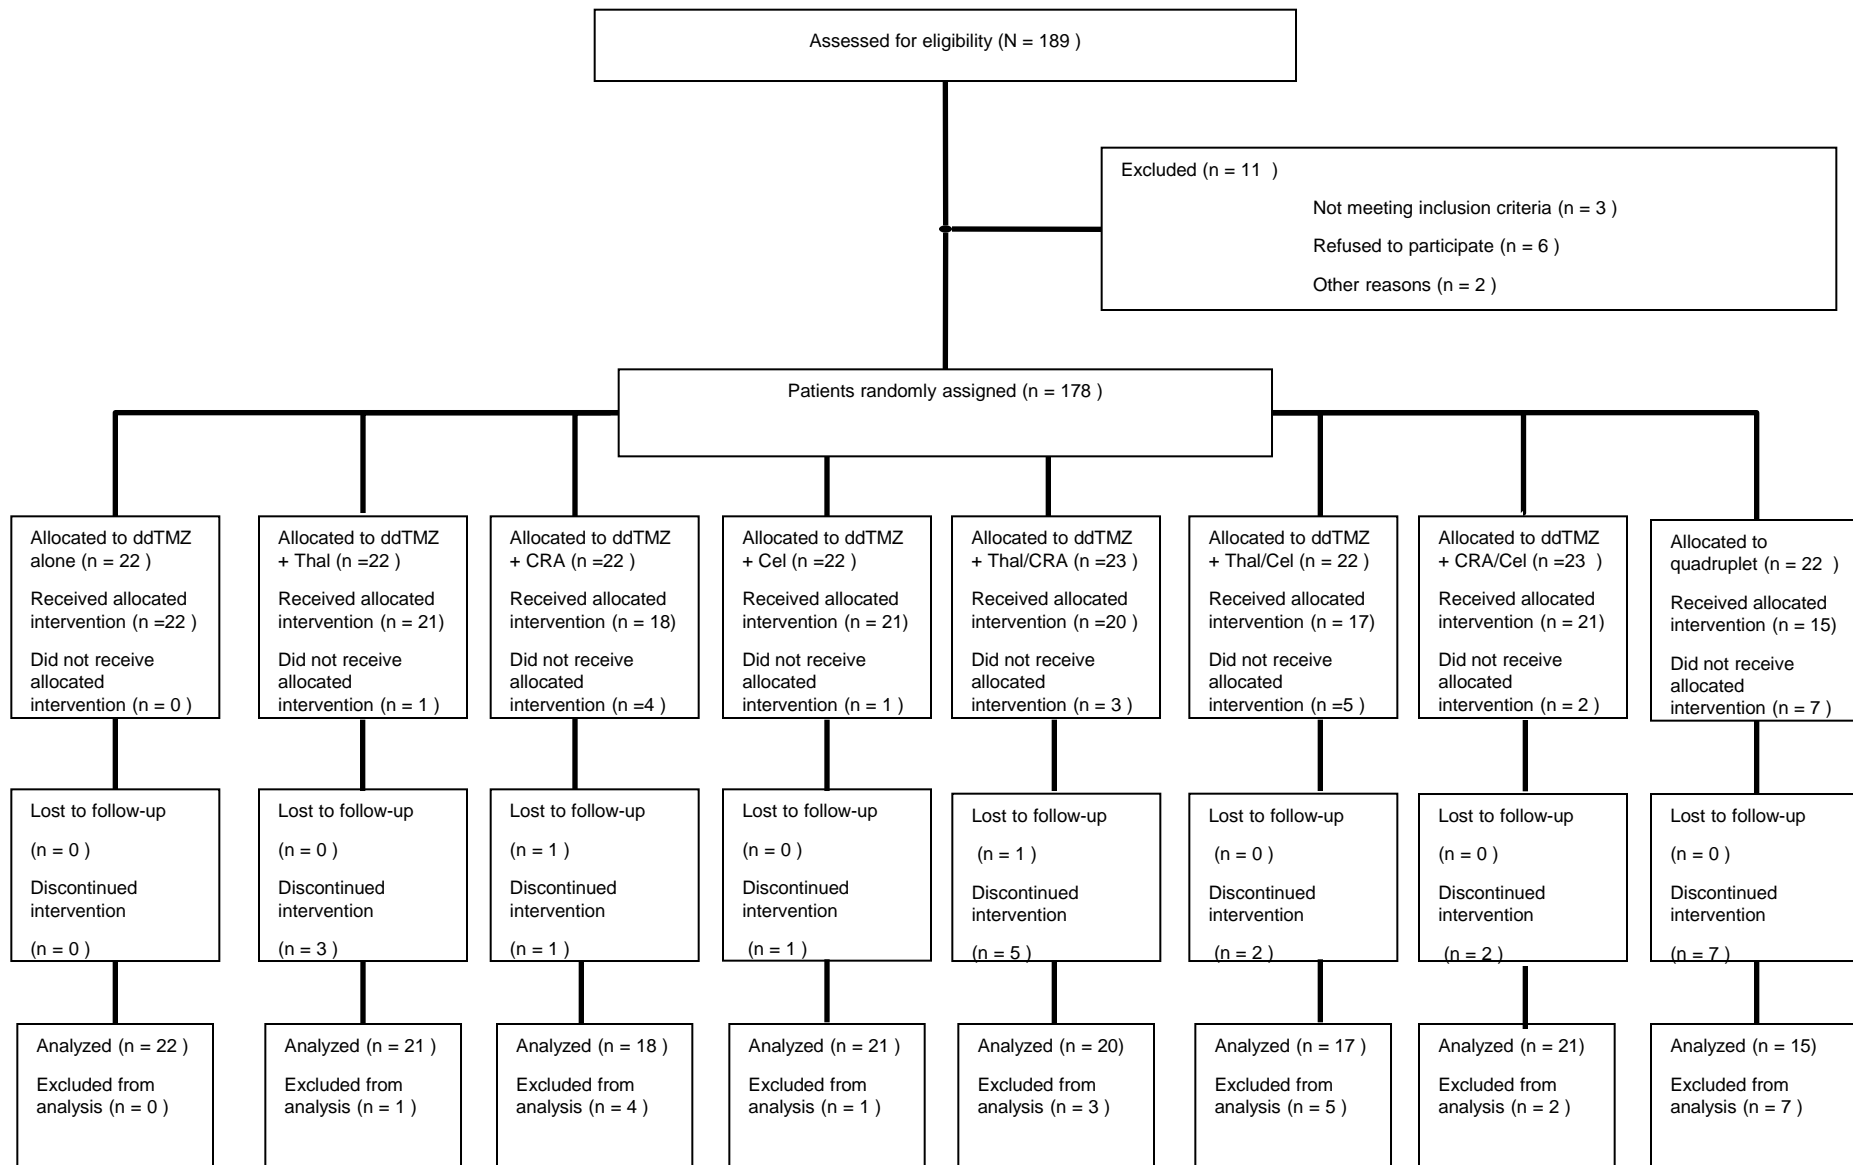

Supplement: supp_nou155_nou155supp_fig5.pdf [file supp_nou155_nou155supp_fig5.pdf]
